# Supplementary material for: Stereochemistry Enhances Potency, Efficacy, and Durability of Malat1 Antisense Oligonucleotides In Vitro and In Vivo in Multiple Species
Source: PubMed Central journal article supplement — Transl Vis Sci Technol. 2021 Jan 12;10(1):23. doi: 10.1167/tvst.10.1.23 (PMC7804567; doi:10.1167/tvst.10.1.23), 2021-01-12
Supplement: tvst-10-1-23_s001.pdf [file tvst-10-1-23_s001.pdf]

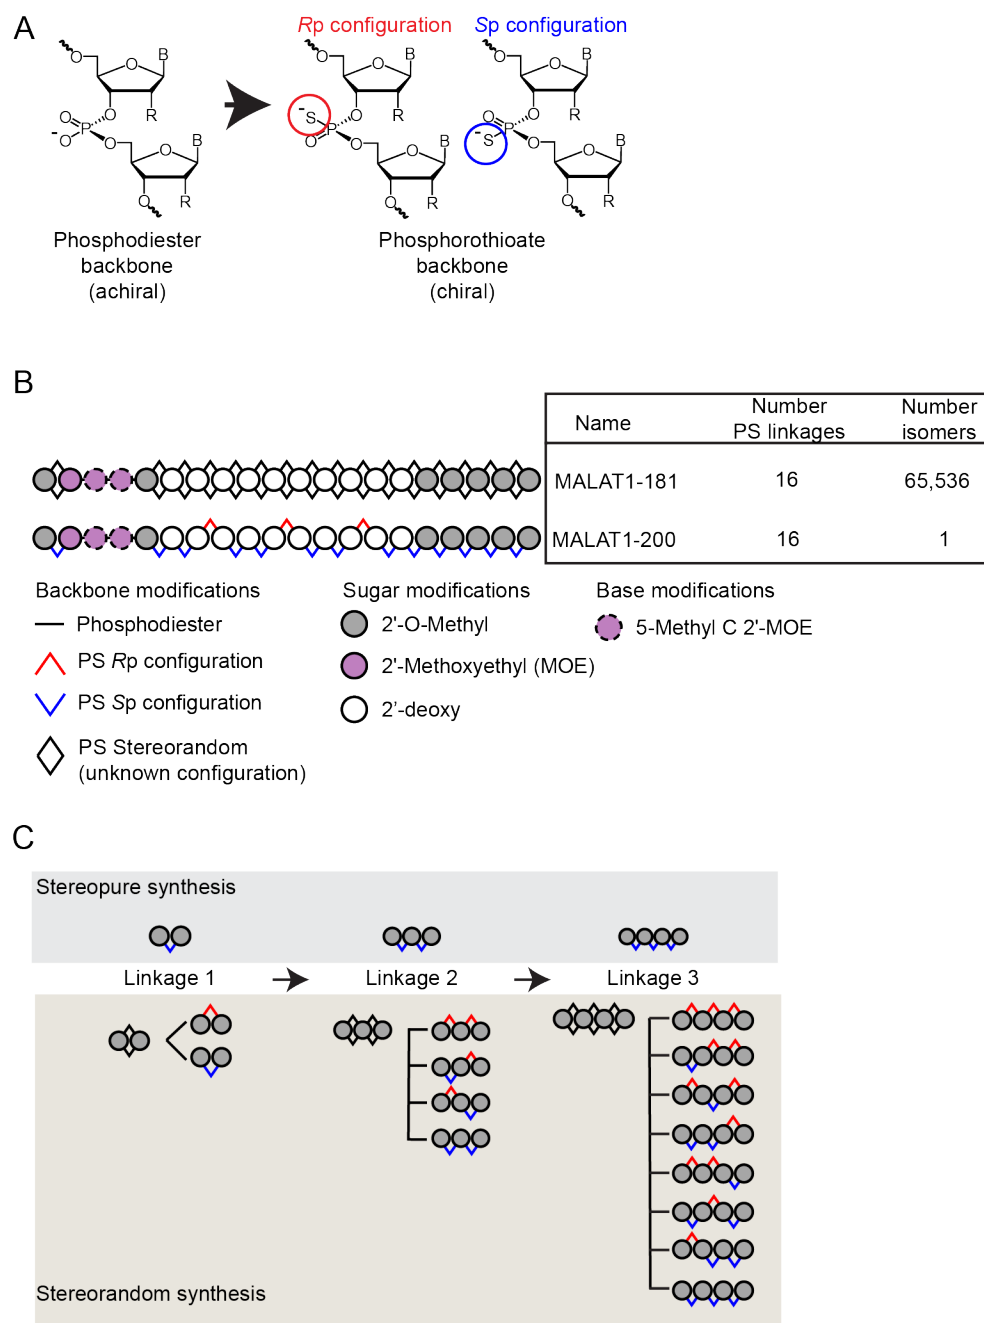

1

2 **Supplementary Fig. 1.** Phosphorothioate (PS) modification introduces chiral centers in  
 3 an oligonucleotide backbone, resulting in the production of complex mixtures of isomers  
 4 when using traditional synthetic chemistries. (A) Chemical structures of natural  
 5 phosphodiester (PO) backbone and chemically modified, chiral PS backbone, showing  
 6 *Rp* and *Sp* configurations. In the PS backbone, a Sulfur (S) atom replaces a non-  
 7 bridging Oxygen (O) atom. (B) Schematic of oligonucleotides used throughout this  
 8 study, showing that the comparator MALAT1-181, generated with industry standard  
 9 chemistry, is a mixture of more than 65,000 isomers, whereas MALAT1-200 is

10 predominately a single isomer. The number of isomers is defined by  $2^n$ , where  $n$  =  
11 number of PS linkages<sup>6</sup>. (C) Schematic illustration of oligonucleotide synthesis showing  
12 how the synthesis of the stereorandom and stereopure oligonucleotides compare. For  
13 both oligonucleotides, synthesis begins from the 3'-end. For the stereopure  
14 oligonucleotide (gray), the illustrated first three steps each yield >99% PS linkages in  
15 the *Sp* configuration. For the stereorandom oligonucleotide (beige), the first step yields  
16 approximately the same amount of PS linkages in the *Sp* configuration and the *Rp*  
17 configurations. For the next step, there are two starting materials, and synthesis yields  
18 approximately the same amount of PS linkages in the *Sp* and *Rp* configurations at the  
19 second position, resulting in a total of four products. For the next step, the same  
20 synthesis pattern yields eight products. Ultimately, this results in a stereorandom  
21 oligonucleotide that is composed of >65,000 isomers.
