# Supplementary material for: Stereochemistry Enhances Potency, Efficacy, and Durability of Malat1 Antisense Oligonucleotides In Vitro and In Vivo in Multiple Species
Source: PubMed Central journal article supplement — Transl Vis Sci Technol. 2021 Jan 12;10(1):23. doi: 10.1167/tvst.10.1.23 (PMC7804567; doi:10.1167/tvst.10.1.23), 2021-01-12
Supplement: tvst-10-1-23_s002.pdf [file tvst-10-1-23_s002.pdf]

## 1 SUPPLEMENTARY METHODS

### 2 Oligonucleotides

3 Stereopure oligonucleotides were synthesized as described previously<sup>1-3</sup>. Stereorandom  
4 oligonucleotides (MALAT1-181) were synthesized using standard procedures. The non-  
5 targeting control (NTC) used in this study was a stereorandom oligonucleotide with 2'-O-  
6 methyl-modified ribose in the terminal 5 nucleotides and 2'-deoxyribose in the central 10  
7 nucleotides with the sequence 5'- CCUUCCCTGAAGGTTCCUCC -3'. Endotoxin levels  
8 for all oligonucleotides used in in vivo studies are in Table S1.

### 9 Measurement of Initial Velocity

10 RNase H1 activity was assessed with the substrate: enzyme ratio of 250:1 as described  
11 previously.<sup>1</sup> The sequence for the *Malat1* RNA surrogate used in these experiments  
12 was 5'- CUGAGUCAUAACCAGCCUGGCA -3'.

### 13 Cell Lines

14 iCell neurons (Cellular Dynamics, Madison, WI) were cultured at 400,000 cells/well.  
15 After 48 h, fresh medium was added containing 10, 30, 100, 300, 1000, or 3000 nM  
16 oligonucleotides, either stereopure or stereorandom, in duplicate. Four days after  
17 treatment, cells were lysed, RNA was extracted, and *MALAT1* expression was  
18 determined by quantitative polymerase chain reaction (qPCR). RNA isolation, cDNA  
19 synthesis, quantification, and normalization of RNA were performed according to routine  
20 practices.

### 21 Human Donor Eyes

22 Human eyes were procured from Lions Gift of Sight (Saint Paul, MN) with the written  
23 consent of the donor or the donor's family for use in medical research in accordance  
24 with the Declaration of Helsinki. Lions Gift of Sight is licensed by the Eye Bank  
25 Association of America (accreditation #0015204) and accredited by the FDA (FDA  
26 Established Identifier 3000718528). Donor tissue is considered a pathological specimen  
27 and is, therefore, exempt from the process of Institutional Review Board approval.

### 28 **Ex Vivo Human Retina Culture**

29 Whole human eyes were procured (Lions Gift of Sight, Saint Paul, MN) and immediately  
30 placed in Dulbecco's modified eagle medium (DMEM) with 10% fetal bovine serum  
31 (FBS), and 1% penicillin-streptomycin. Approximately 15-24 hours post-enucleation,  
32 retinas were dissected into pieces of approximately equal size, added to a 96-well dish  
33 containing media described above, and treated with PBS or antisense oligonucleotide  
34 under free uptake (gymnotic) conditions for 48 hours. Specifically, retinal dissection was  
35 performed by removal of the cornea, iris and lens to expose the eye cup with surgical  
36 scissors. The eye cup was inverted over the lid of a 96-well dish, and using sterile  
37 forceps, the vitreous and retina were teased away from the choroid and placed onto the  
38 lid of the dish. A sterile scalpel was used to slice through the vitreous (avoiding the  
39 retina) to dissociate the vitreous gel matrix. A surgical forcep and scissors were then  
40 used to pick up and cut, respectively, tear-drop sized portions of vitreous containing  
41 retina and added to each treatment well of the 96-well dish. Retinal pieces were cut at  
42 random across the retinal quadrants since *MALAT1* is expressed ubiquitously. Dose  
43 levels were chosen based on in vitro activity experiments. RNA was extracted and RNA  
44 levels were evaluated as described below.

**45 Quantification of RNA**

46 qPCR was performed in a reaction mixture including diluted sample (4  $\mu$ L from a mix of  
47 20  $\mu$ L of cDNA and 30  $\mu$ L of water) using either mouse *Malat1* primers (Thermo Fisher  
48 Mm01227912\_s1) for rodent samples or human *MALAT1* primers (Thermo Fisher  
49 Hs00273907-s1) for NHP and human samples in addition to the normalizer primers for  
50 mouse *Hprt* (IDT, forward primer CAA ACT TTG CTT TCC CTG GTT, probe sequence  
51 ACC AGC AAG CTT GCA ACC TTA ACC, reverse primer TGG CCT GTA TCC AAC  
52 ACT TC) or human *HPRT* (Thermo Fisher Hs02800695\_m1). The thermocycling  
53 conditions for PCR include 40 cycles of 95°C for 3 minutes; 95°C for 10 seconds; and  
54 60°C for 30 seconds.

**55 Statistical Analysis**

56 All statistical analyses were conducted using R version 3.6.3<sup>4</sup>. Linear models were built  
57 using the *stats* package. Sigmoidal dose-response models were built using the *drc*  
58 package. Analysis of variance was performed using the *av* package; for analysis of  
59 covariance a same-slope model was employed. Summary statistics for data or model  
60 parameters were given as the mean or median with 95% confidence intervals. We  
61 report *P* values for all null-hypothesis significance tests in the text. Graphs were  
62 generated using the package *ggplot2*, and model fits were accompanied by their 95%  
63 confidence intervals whenever possible.

**64 RNA Isolation and cDNA Synthesis**

65 Frozen tissue was added to 700  $\mu$ L of TRIzol and homogenized for 3 minutes.  
66 Bromochloropropane was added to each sample, which was shaken vigorously and

67 centrifuged at 4000g for 5 minutes. Supernatant (250  $\mu$ L) was transferred to the binding  
68 plate from SV96 total RNA extraction kit (Promega) and RNA was extracted per  
69 protocol. cDNA was synthesized by adding 3  $\mu$ L of total RNA to a 20  $\mu$ L reverse-  
70 transcription reaction using the High-Capacity cDNA Reverse-Transcription Kit (Thermo  
71 Fisher #4368814).

## 72 **Quantification/Normalization of RNA**

73 qPCR was performed in reaction mixture including diluted sample (4  $\mu$ L from a mix of 20  
74  $\mu$ L of cDNA and 30  $\mu$ L of water), *Malat1* primers (Thermo Fisher Mm01227912\_s1), and  
75 the normalizer primers for *HPRT* (IDT, forward primer CAA ACT TTG CTT TCC CTG  
76 GTT, reverse primer TGG CCT GTA TCC AAC ACT TC). The thermocycling conditions  
77 for PCR include 40 cycles of 95°C for 3 minutes, 95°C for 10 seconds, and 60°C for 30  
78 seconds.

## 79 **Animals and IVT Injections**

80 All animal work was performed in accordance with the ARVO Statement for the Use of  
81 Animals in Ophthalmic and Vision Research and was approved by the institutional  
82 animal care and use committee of Biomere - Biomedical Research Models, Inc.  
83 (Worcester, MA). Both C57BL/6 mice and non-human primates (NHPs) were given  
84 oligonucleotide via IVT injection. Mice and NHPs were on a 12-hour light-dark cycle.  
85 Food (monkey diet 5038 or lab diet 5001) and water were available ad libitum. All  
86 injections were performed by Ora, Inc. or Biomere biomedical by veterinary staff (mice)  
87 or board-certified veterinary ophthalmologist (NHP).

88 C57BL/6 female mice (The Jackson Laboratory, Bar Harbor, ME) were ~8 weeks of age  
89 at the time of dosing. Mice were anesthetized with 30-40 mg/kg ketamine and 0.5-10  
90 mg/kg xylazine. While mice were anesthetized, a 3  $\mu$ L drop of 0.5% proparacaine  
91 hydrochloride was applied to both eyes. A 100  $\mu$ L NanoFil syringe with a 33-gauge  
92 needle was inserted into the vitreous, 3 mm posterior to the limbus taking care to avoid  
93 the iris or lens. The test article (1  $\mu$ L) was injected into the vitreous of the eye by using a  
94 micromanipulator and microinjection pump. Following injection, the needle was left in  
95 place for approximately 30 seconds. Test article was injected into each eye of all mice.  
96 Antibiotic ointment was applied to the eyes after injection. After the procedure, mice  
97 were monitored until recovered. Mice received either 0.5, 5, 15, or 50  $\mu$ g per injection  
98 depending on the experiment.

99 Male NHPs used in this study were non-naïve cynomolgus macaques weighing ~2.5-5.0  
100 kg at the time of dosing. All animals had at least a 30-day washout period prior to  
101 dosing. NHPs were anesthetized with ketamine (5-15 mg/kg) via intramuscular injection.  
102 While the animals were anesthetized, 2-5 drops of 0.5% proparacaine was applied to  
103 both eyes for anesthesia. After ~2 minutes, 1-2 drops of Betadine (5%) were added to  
104 each eye and left for ~5 minutes. Excess was wicked away with an ocular absorbent  
105 spear and rinsed with saline. The eyes were held open with a speculum and positioned  
106 into place with a cotton-tipped applicator. A 28-30-gauge insulin syringe (U-100) was  
107 used to inject 50  $\mu$ L into the eye at a 45-degree angle pointed toward the optic nerve  
108 (caution was taken to avoid touching the lens). Following the injection, the needle was  
109 slowly removed, and the eye was monitored for efflux. Antibiotic ointment was applied  
110 immediately after injection, and animals were monitored until recovery. NHPs received

111 45, 150 or 450  $\mu\text{g}$  per injection. The lowest active dose in our mouse studies was 0.5  
112  $\mu\text{g}$ . The equivalent NHP dose (assuming a NHP vitreous volume of 3 mL, 600-times  
113 greater volume than mouse) is 300  $\mu\text{g}$ . We chose two doses below and one dose above  
114 the lowest mouse-active dose.

### 115 **In vivo endpoints**

116 In vivo experiments were evaluated for potency, efficacy and durability. Potency is  
117 defined as to the relative decrease of *Malat1* RNA following treatment with one  
118 oligonucleotide compared to another. For example, if 5  $\mu\text{g}$  of oligo1 leads to a greater  
119 depletion of *Malat1* RNA than 50  $\mu\text{g}$  of oligo2, then oligo1 is more potent than oligo2.  
120 Efficacy is defined as the relative amount of *Malat1* RNA that is depleted at a given  
121 concentration of oligonucleotide. For example, if 5  $\mu\text{g}$  oligo1 leads to a greater depletion  
122 of *Malat1* RNA than 5  $\mu\text{g}$  of oligo2, then oligo1 is more efficacious than oligo2. Durability  
123 is defined as the length of time *Malat1* RNA remains at or below 50% of its normal level  
124 of expression.

### 125 **Tissue Collection**

126 Animal eyes were enucleated and immediately frozen on dry ice. For mouse studies,  
127 each frozen globe was bisected along the coronal plane to separate what we are calling  
128 the “anterior portion” (cornea, iris, lens, partial sclera) and the “posterior portion” (retina,  
129 choroid, sclera) of each eye. For NHPs, the enucleated eyes were dissected either as  
130 anterior and posterior portions (as described above) or were dissected to isolate retina,  
131 choroid/sclera, cornea, iris, and vitreous tissues. Each tissue was placed in a pre-  
132 labeled, pre-weighed 1.5 mL Eppendorf tube and stored at  $-80^{\circ}\text{C}$  until processed.

**133 Histology**

134 Whole animal eyes were enucleated, placed in Davidson's fixative for 24 hours,  
135 transferred to 70% ethanol, and then processed and embedded in paraffin. The tissue  
136 was cut into 5 µm sections and evaluated by using ViewRNA Tissue Core Kit 96 assay  
137 (Thermo Fisher, cat#:19942) for *MALAT1* RNA (Thermo Fisher, cat#:VB6-17323) or  
138 oligonucleotide sequence-specific ViewRNA (Thermo Fisher, custom design) to detect  
139 oligonucleotides.

**140 Quantification of *MALAT1* oligonucleotides by hybridization ELISA**

141 We utilized the following probes to selectively quantify the oligonucleotides by  
142 hybridization ELISA: Malat1-Univ-Capture probe /5AmMC12/G+A+G+T+C+A+T+AA;  
143 Malat1-Univ-Detection probe CC+AGC+CT+GG/3BioTEG/ (Integrated DNA  
144 Technologies, Coralville, IA). We coated maleic anhydride-activated 96-well plates  
145 (Pierce 15110) with 50 µL of capture probe at 500 nM in 2.5% NaHCO<sub>3</sub> (Gibco, 25080-  
146 094) for 2 h at 37°C. The plate was then washed 3 times with PBST (PBS + 0.1%  
147 Tween-20), blocked with 5% fat free milk-PBST at 37°C for 1 h. Payload oligonucleotide  
148 was serially diluted into matrix. This standard together with original samples were  
149 diluted with lysis buffer so that the oligonucleotide amount in all samples was less than  
150 50 ng/mL. 20 µL of diluted samples were mixed with 180 µL of 333 nM detection probe  
151 diluted in PBST, then denatured (65°C, 10 minutes, 95°C, 15 minutes, 4°C, ∞). 50 µL of  
152 the denatured samples were distributed in blocked ELISA plates in duplicates, and  
153 incubated overnight at 4°C. After 3 washes with PBST, 50 µL of 1:2000 streptavidin-AP  
154 (Southern Biotech, 7100-04) in PBST was added, 50 µL per well and incubated at room  
155 temperature for 1 h. After extensive washes with PBST, 100 µL of AttoPhos (Promega

156 S1000) was added, incubated at room temperature in the dark for 10 minutes and read  
157 on the plate reader (Molecular Device, M5) fluorescence channel: Excitation: 435 nm,  
158 Emission: 555 nm. The oligonucleotide in samples were calculated according to  
159 standard curve by 4-parameter regression. The lower limit of detection was 1.25 µg  
160 oligonucleotide/g of tissue.

### 161 **Pharmacokinetic (PK)-pharmacodynamic (PD) analysis**

162 For PK-PD analyses, the concentration of oligonucleotide detected in a specific tissue  
163 or portion (eg, posterior portion of mouse eye) as measured by hybridization ELISA (see  
164 above) were plotted with respect to quantified and normalized expression of *Malat1*  
165 RNA (see above) in the same tissue at the same time.

166

### 167 **SUPPLEMENTARY REFERENCES**

- 168 1. Iwamoto N, Butler DCD, Svrzikapa N, et al. Control of phosphorothioate  
169 stereochemistry substantially increases the efficacy of antisense  
170 oligonucleotides. *Nature biotechnology*. 2017;35(9):845-851.
- 171 2. Butler D, Iwamoto, N., Meena, M., Svrzikapa, N., Verdine, G.L., Zlatev, I.,  
172 Inventor. Chiral Control. US patent WO20140120812014. May 29, 2018.
- 173 3. Butler DCD, Hencken CP, Iwamoto N, et al., Inventors. Compounds,  
174 Compositions and Methods for Synthesis. US patent WO2018237194. December  
175 27, 2018.
- 176 4. Team RC. R: A language and environment for statistical computing.  
177 <https://www.R-project.org/>. Accessed Feb. 29, 2020.

178
