# Supplementary material for: Stereochemistry Enhances Potency, Efficacy, and Durability of Malat1 Antisense Oligonucleotides In Vitro and In Vivo in Multiple Species
Source: PubMed Central journal article supplement — Transl Vis Sci Technol. 2021 Jan 12;10(1):23. doi: 10.1167/tvst.10.1.23 (PMC7804567; doi:10.1167/tvst.10.1.23), 2021-01-12
Supplement: tvst-10-1-23_s003.pdf [file tvst-10-1-23_s003.pdf]

1

| Oligonucleotide             | Endotoxin level (EU/mg) |
|-----------------------------|-------------------------|
| Non-targeting control (NTC) | < 0.021                 |
| MALAT1-181                  | < 0.027                 |
| MALAT1-200                  | < 0.027                 |

2 **Table S1.** Endotoxin levels of oligonucleotides tested in vivo.
